# Supplementary material
Source: PubMed Central journal article supplement (PMC7558034)
Supplement: ao0c04022_si_001.pdf [file ao0c04022_si_001.pdf]

**Supporting Information**  
**Rational design of hierarchical structural**  
**CoSe@NPC/CoSe@CNTs nanocomposites derived from**  
**metal-organic-frameworks as a robust Pt-free**  
**electrocatalyst for dye-sensitized solar cells**

Tong Wang<sup>1, a</sup>, Yongjian Li<sup>1, a</sup>, Hansheng Li<sup>a, \*</sup>, Daxin Shi<sup>a</sup>, Qingze Jiao<sup>a, b</sup>,

Yun Zhao<sup>a</sup>, Pengju Su<sup>a</sup>, Wei Wang<sup>a</sup>, and Qin Wu<sup>a, \*</sup>

<sup>a</sup> School of Chemistry and Chemical Engineering, Beijing Institute of Technology,  
Zhongguancun South Street, Beijing 100081, China

<sup>b</sup> School of Materials and Environment, Beijing Institute of Technology, Jinfeng Road  
No.6, Xiangzhou District, Zhuhai 519085, China

\* Corresponding author

E-mail: hanshengli@bit.edu.cn (H. Li), wuqin\_bit@126.com(Q. Wu).

<sup>1</sup> Tong Wang and Yongjian Li contributed equally to this work.

Number of pages: 4

Number of figures: 7

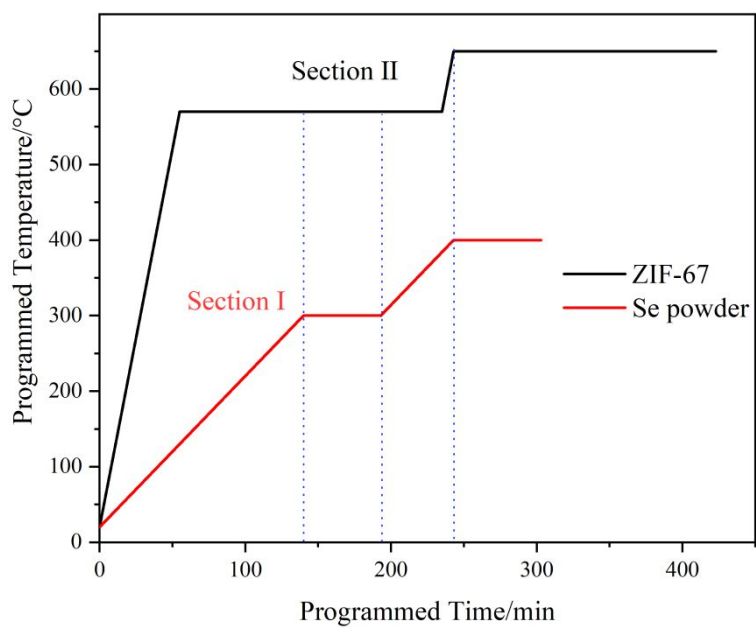

**Figure S1** The heating program of MSTPE to prepare CoSe@NPC/CoSe@CNTs

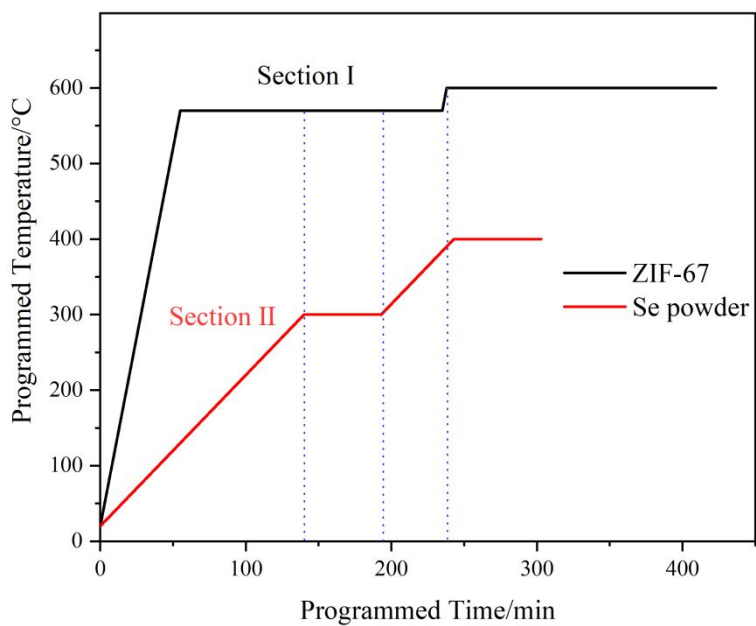

**Figure S2** The control heating program of MSTPE

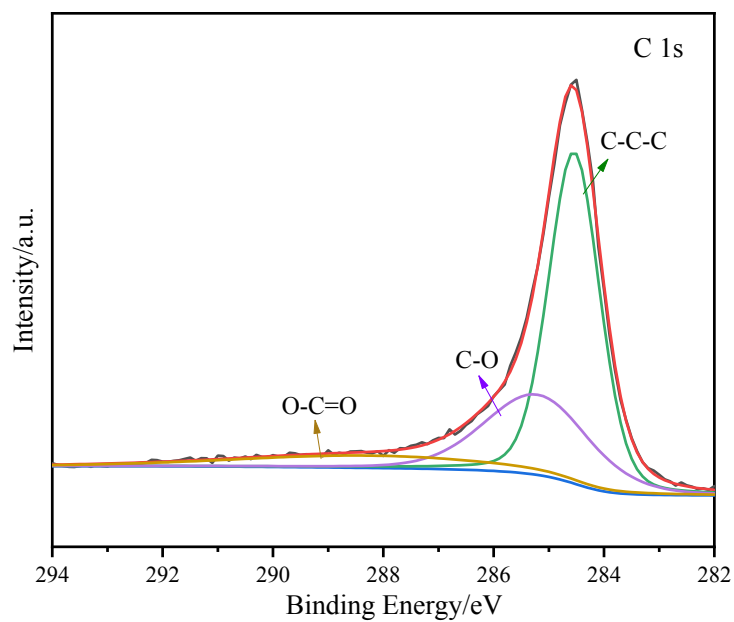

**Figure S3** High-resolution XPS survey spectra of C 1s CoSe@NPC/CoSe@CNTs sample.

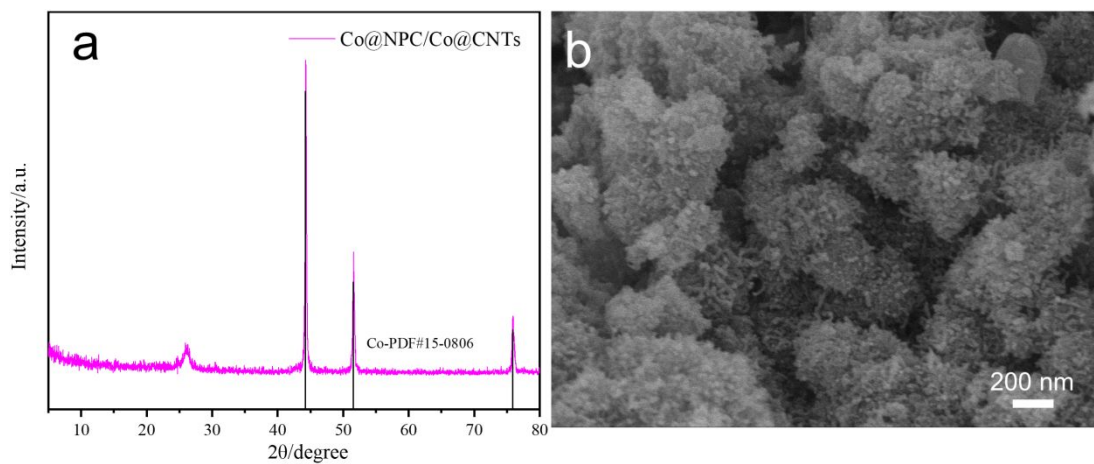

**Figure S4** (a)XRD pattern and (b)SEM image of the intermediate product Co@NPC/Co@CNTs

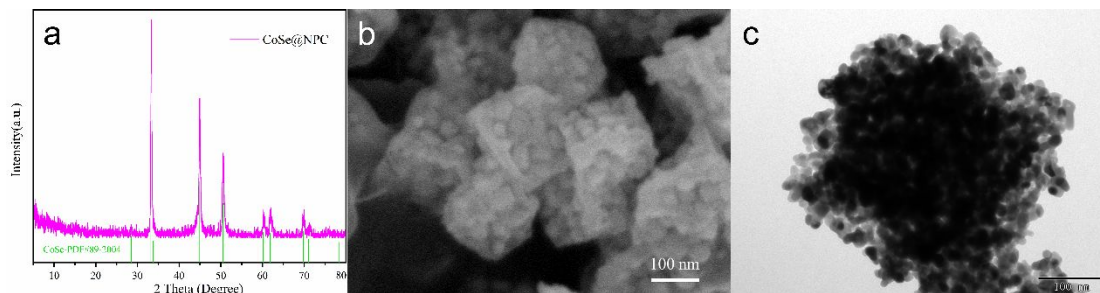

**Figure S5** (a)XRD pattern, (b)SEM image and (c)TEM image of CoSe@NPC

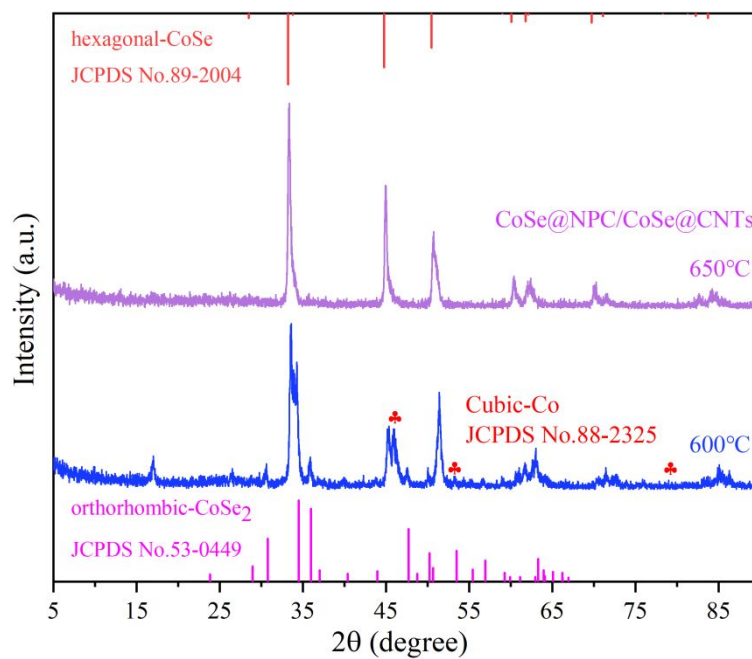

**Figure S6** The XRD pattern of selenization of ZIF-67 with different temperature

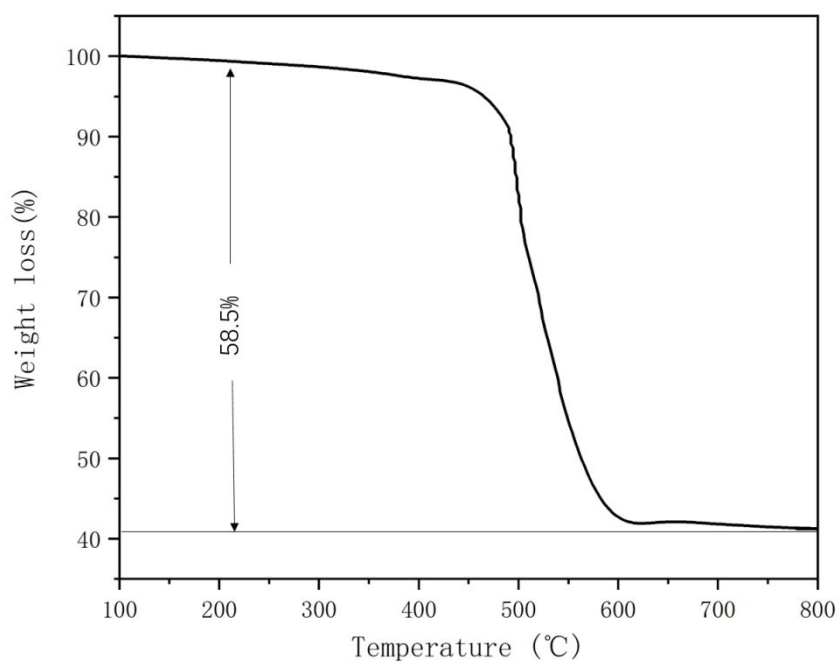

**Figure S7** TGA curve of the CoSe@NPC/CoSe@CNTs in air atmosphere.
